# Supplementary material for: Perceptual Sensitivity, but not Metacognitive Monitoring, is Dependent on Varying Levels of Control
Source: Research Square preprint supplement (doi:10.21203/rs.3.rs-8589893/v1), 2026-01-29
Supplement: Supplementary file 1 [file d7a5450011e56fe8f1ce033d.docx]

# Supplementary material

*
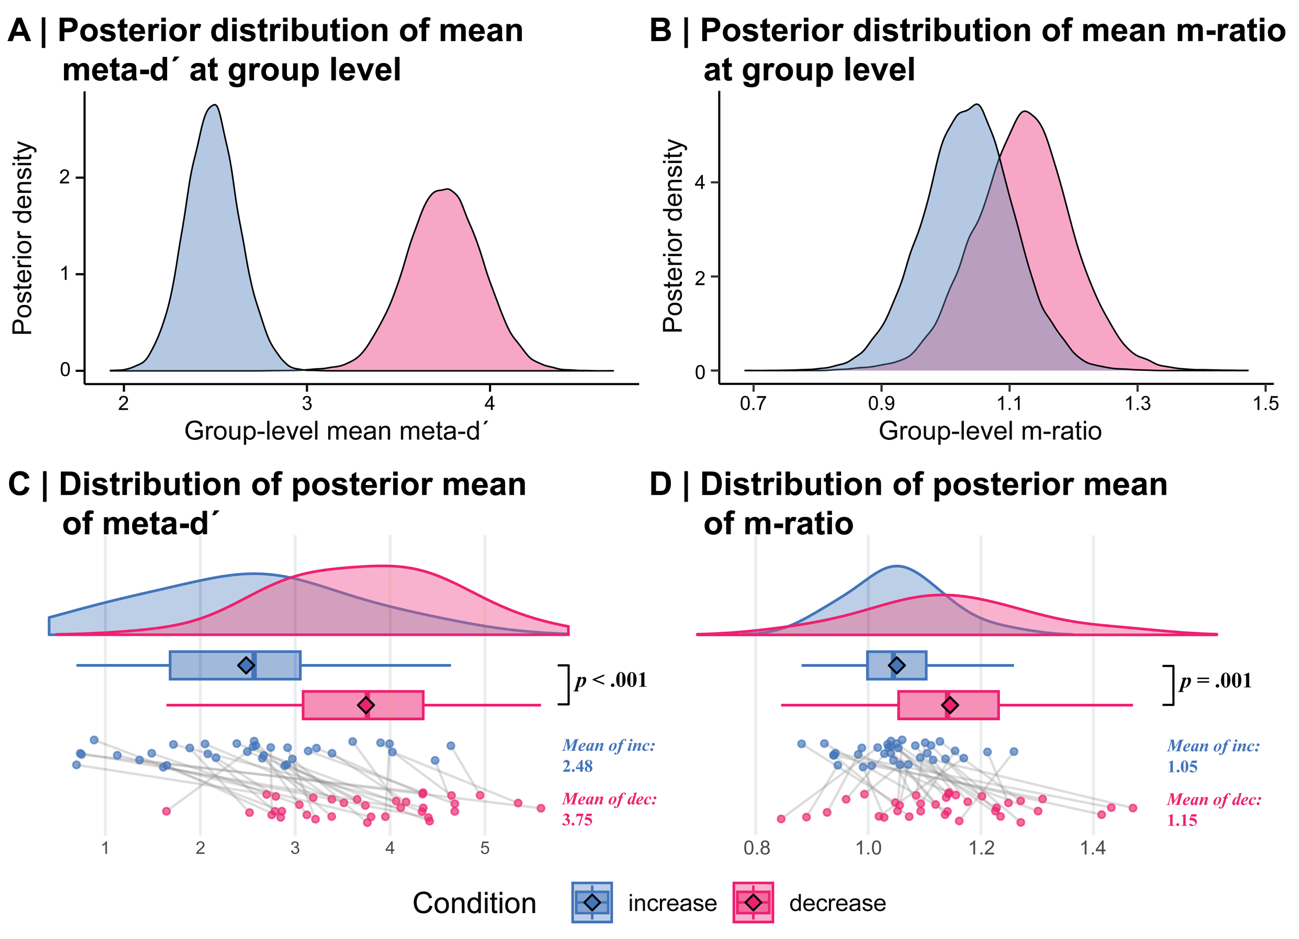
*

**Figure S1.** Estimation results for meta-d´ and m-ratio obtained with hierarchical Bayesian modeling using HMeta-d. Panel A shows the group-level posterior distributions of meta-d´ for each condition. The posterior means of meta-d´ for the decrease condition was 3.77, with a 95% Bayesian credible interval (CrI) of [3.36, 4.19], whereas for the increase condition the mean was 2.49 with a 95% CrI of [2.20, 2.79]. Panel B shows the corresponding group-level posterior distributions of m-ratio. For the decrease condition, the posterior mean m-ratio was 1.13 (95% CrI [0.98, 1.28]), and for the increase condition it was 1.03 (95% CrI [0.89, 1.18]). The posterior distribution of the group-level difference in m-ratio had a mean of −0.09 and a 95% CrI of [−0.31, 0.11], indicating only weak evidence for a reduction in m-ratio. Panels C and D illustrate the distributions of participant-level estimates of meta-d´ and m-ratio, respectively. Each dot represents the posterior mean of an individual parameter estimate obtained from the hierarchical model. Paired *t*-tests applied to these participant-level point estimates revealed a large decrease in meta-d´ in the increase relative to the decrease condition (t(34) = 6.73, *p* < .001, Cohen’s *d* = 1.14) and a small-to-moderate decrease in m-ratio (t(34) = 3.78, *p* < .001, Cohen’s *d* = 0.64). Gelman–Rubin convergence statistics R̂ for both group- and participant-level parameters were approximately 1.00 and effective sample sizes were high, indicating satisfactory MCMC convergence.


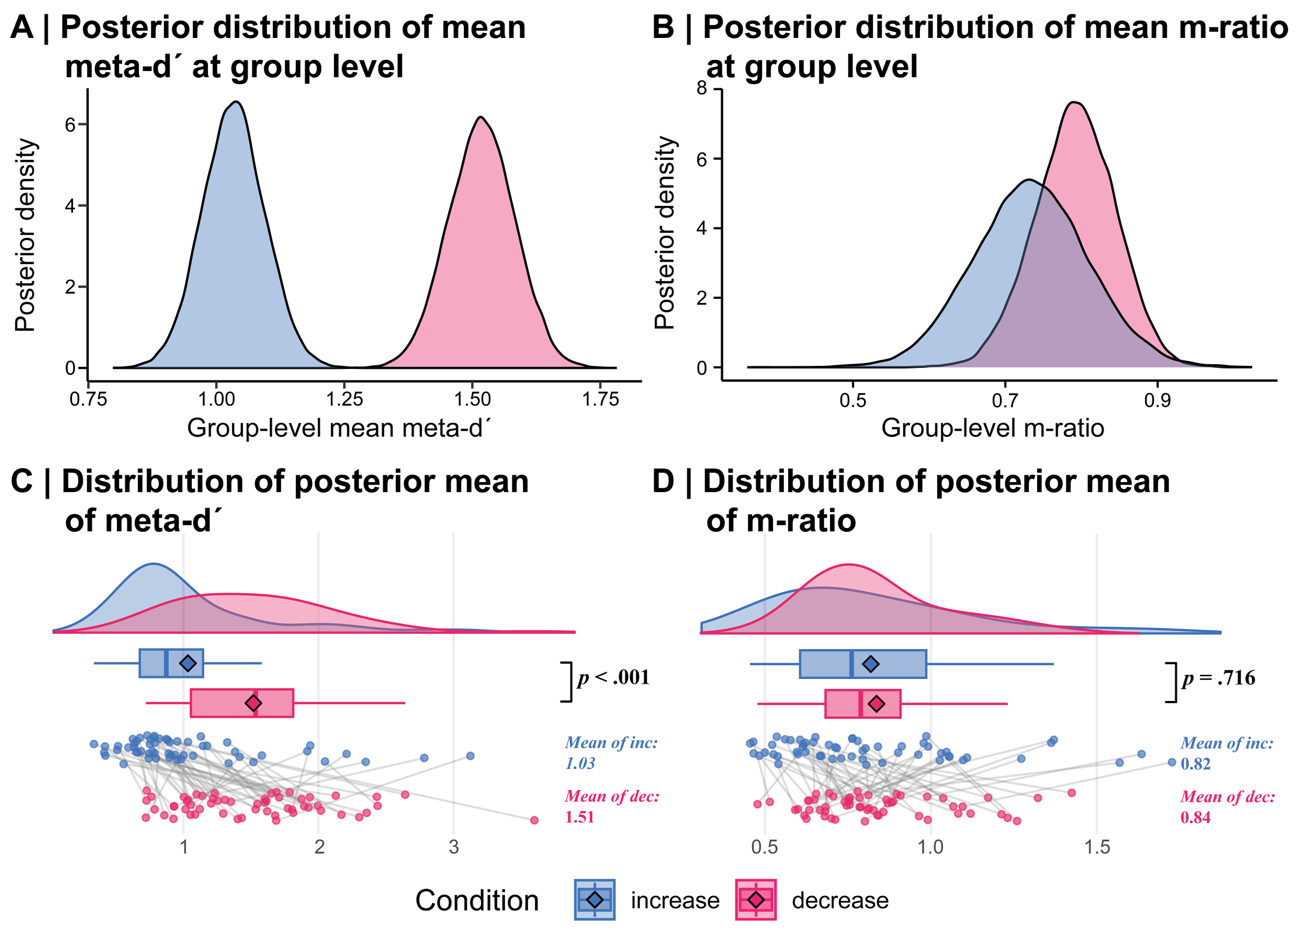


**Figure S2.** Estimation results for meta-d´ and m-ratio using hierarchical Bayesian modeling with HMeta-d after applying stricter exclusion criteria (N=56). Panel A shows the group-level posterior distributions of meta-d´ for each condition. The posterior means meta-d´ was again higher in the decrease than in the increase condition (1.52, 95% CrI [1.39, 1.64] vs. 1.03, 95% CrI [0.91, 1.16]). Panel B shows the corresponding group-level posterior distributions of m-ratio. The posterior mean m-ratio was 0.79 (95% CrI [0.69, 0.89]) for the decrease condition and 0.73 (95% CrI [0.59, 0.88]) for the increase condition, and the posterior mean difference (increase − decrease) of −0.06 (95% CrI [−0.24, 0.13]) again indicated little evidence for a substantial change in metacognitive efficiency at the group level. Panels C and D illustrate the distributions of participant-level estimates of meta-d´ and m-ratio, respectively; each dot represents the posterior mean of an individual parameter obtained from the hierarchical model. Paired t-tests on these participant-level posterior means showed a clear difference in meta-d´ between conditions (t(55) = 4.54, p < .001, Cohen’s d = 0.60), whereas the difference in m-ratio remained very small and non-significant (t(55) = 0.37, p = .716, Cohen’s d = 0.05), with m-ratio estimates being only weakly correlated across conditions (r ≈ .03). As in the full sample, R̂ values were approximately 1.00 and effective sample sizes were high for all parameters, confirming satisfactory MCMC convergence.


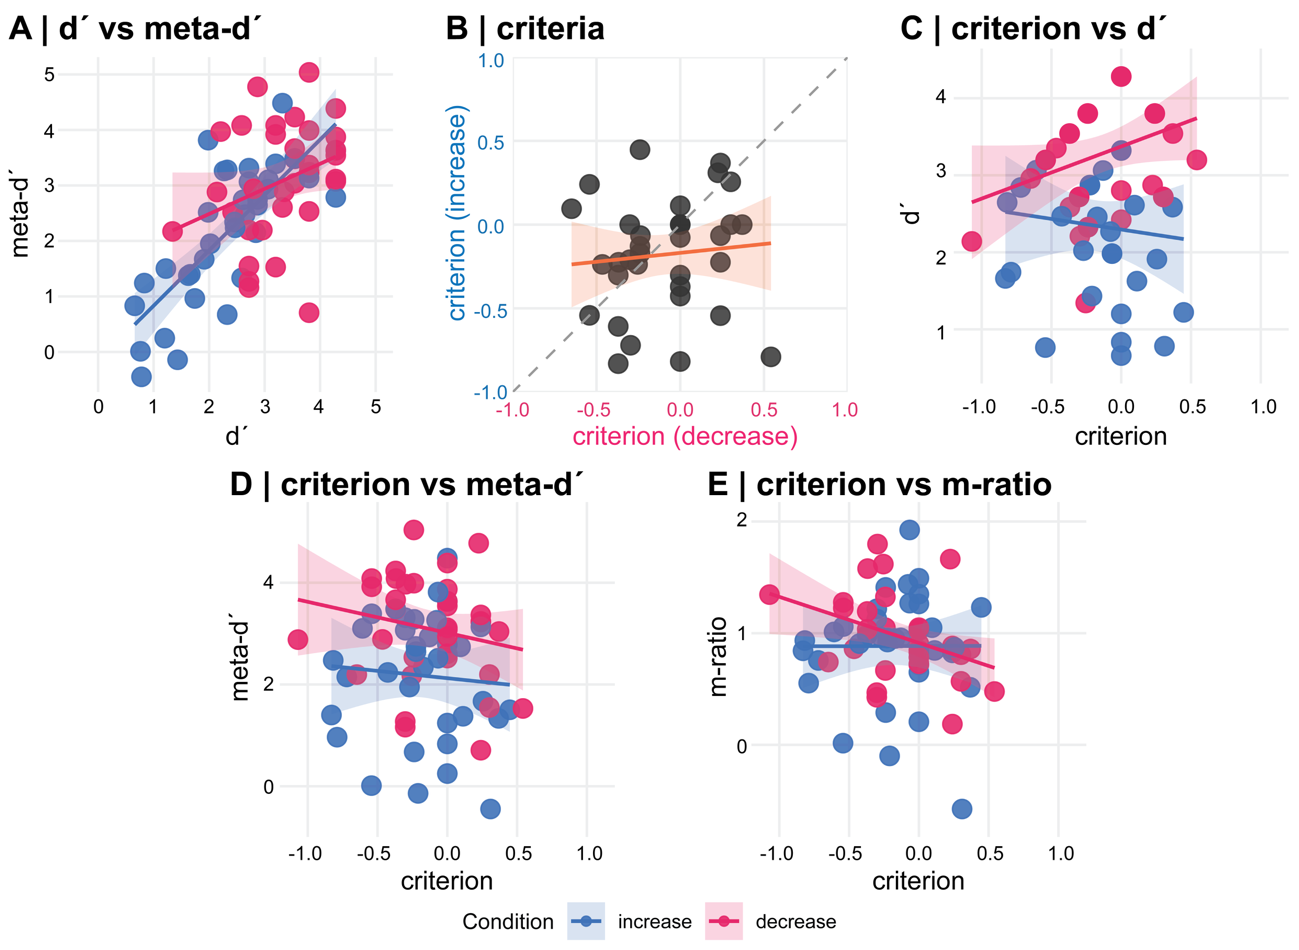


**Figure S3.** Correlations between d´, meta-d´, m-ratio, and criterion in Experiment 1. The analysis included participant with d´ > 0.5 (N=34). Panel A shows the correlation between perceptual sensitivity (d´) and metacognitive sensitivity (meta-d´). A significant positive correlation was observed in the increase condition (r(32) = 0.77, p < .001), whereas the correlation was marginal in the decrease condition (r(32) = 0.31, p = 0.073). Panel B depicts the correlation of decision criteria between the increase and decrease in control conditions. No significant correlation was observed (r(32) = 0.11, p = .0.541), suggesting that decision biases were not consistent across conditions. Panel C shows no significant correlation between criteria and d´ in either condition (increase: r(32) = -0.09, p = .598; decrease: r = 0.31, p = .078). Panel D shows no significant correlation between decision criteria and meta-d´ in either condition (increase: r(32) = -0.08, p = .649; decrease: r(32) = -0.20, p = .261). Panel E depicts the relationship between decision criteria and m-ratio. A significant negative correlation was found in the decrease condition (r(32) = -0.38, p = .025), indicating that a liberal bias (lower criterion) was associated with higher metacognitive efficiency. In contrast, no correlation was observed in the increase condition (r(32) = -0.01, p = .971).


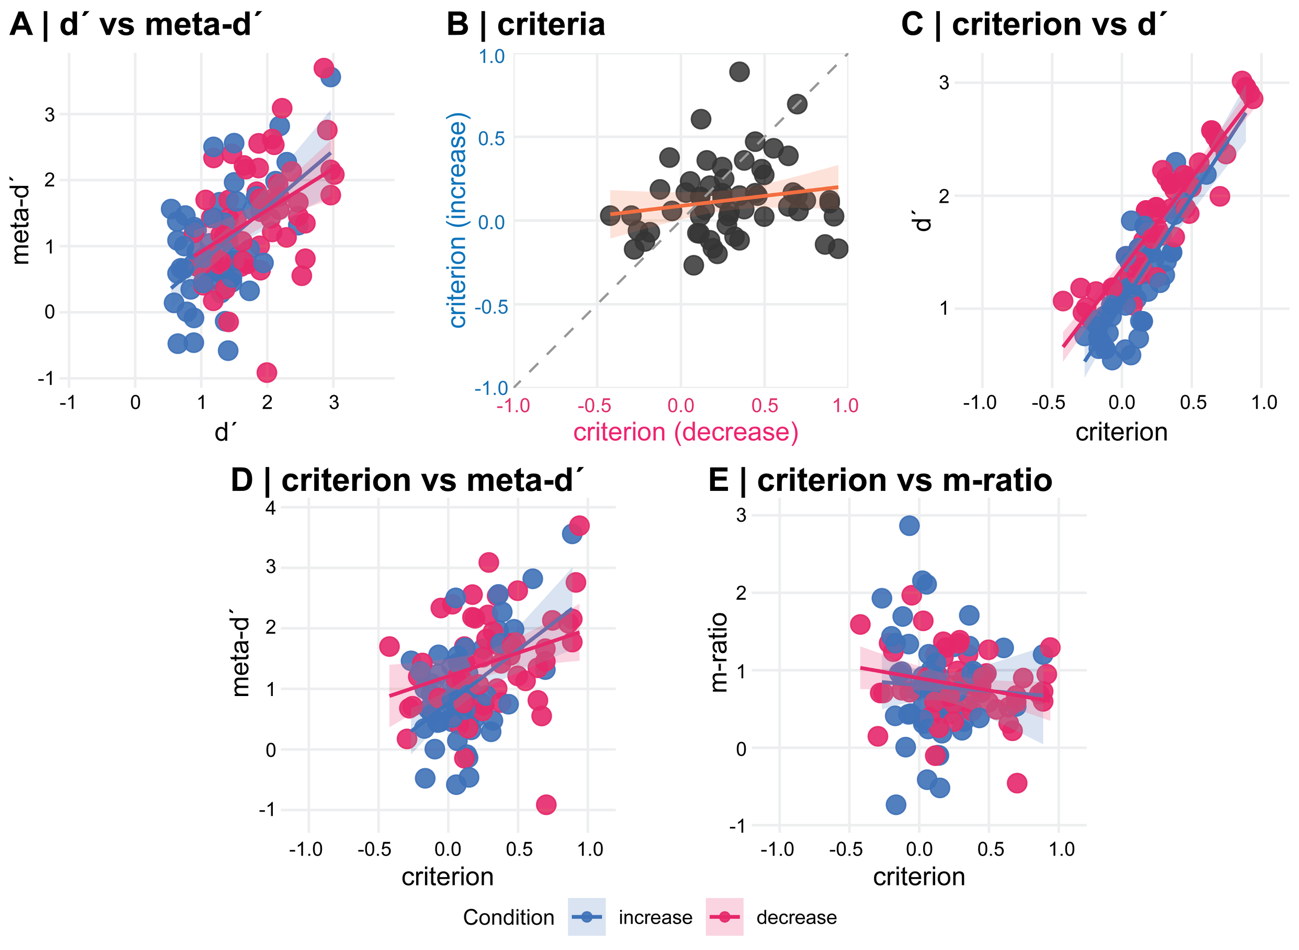


**Figure S4.** Correlations between d´, meta-d´, m-ratio, and criterion in Experiment 2. The analysis included participants with d´ > 0.5. Panel A shows the correlation between perceptual sensitivity (d´) and metacognitive sensitivity (meta-d´). Significant positive correlations were observed in both conditions (increase: r(54) = 0.52, p < .001; decrease: r(54) = 0.44, p < .001), indicating that participants with higher perceptual sensitivity also exhibited higher metacognitive sensitivity. Panel B displays the correlation of decision criteria between the increase and decrease conditions. No significant correlation was found (r(54) = 0.18, p = .197), suggesting that decision biases were not consistent across conditions. Panel C shows strong positive correlations between decision criteria and d´ in both conditions (increase: r(54) = 0.86, p < .001; decrease: r(54) = 0.94, p < .001). Panel D shows significant positive correlations between decision criteria and meta-d´ in both conditions (increase: r(54) = 0.49, p < .001; decrease: r(54) = 0.31, p = .021). Panel E depicts the relationship between decision criteria and m-ratio. No significant correlation was observed in the increase condition (r(54) = -0.05, p = .711). In the decrease condition, a marginal negative correlation was observed (r(54) = -0.24, p = .074), but it did not reach statistical significance. This suggests that unlike d´ and meta-d´, metacognitive efficiency (m-ratio) is largely independent of decision bias in Experiment 2, with only a weak trend in the decrease condition.
